# Supplementary material for: Partial Purification, Identification, and Quantitation of Antioxidants from Wild Rice (Zizania latifolia)
Source: PubMed Central journal article supplement (PMC6278310; doi:10.3390/molecules23112782), 2018-10-26
Supplement: molecules-23-02782-s001.pdf [file molecules-23-02782-s001.pdf]

## Supplementary Materials for

# Partial Purification, Identification, and Quantitation of Antioxidants from Wild Rice *Zizania latifolia*

Mei-Jun Chu, Xin-Min Liu, Ning Yan, Feng-Zhong Wang, Yong-Mei Du \* and Zhong-Feng Zhang \*

### Contents

|                                                                                                                                                                                                                                                                                                                                                                                                                                   |    |
|-----------------------------------------------------------------------------------------------------------------------------------------------------------------------------------------------------------------------------------------------------------------------------------------------------------------------------------------------------------------------------------------------------------------------------------|----|
| <b>Table S1.</b> Phenolic acids and flavonoids found in wild rice in previous reports. ....                                                                                                                                                                                                                                                                                                                                       | 1  |
| <b>Table S2.</b> Physical properties of six macroporous resins. ....                                                                                                                                                                                                                                                                                                                                                              | 6  |
| <b>Table S3.</b> The ion transitions, optimized MS parameters, and linear relationships of the standards in UPLC-QqQ-MS/MS analysis. ....                                                                                                                                                                                                                                                                                         | 7  |
| <b>Figure S1.</b> The radical scavenging activities of DPPH (A) and ABTS (B), reducing power (C), total flavonoid content (TFC) (D), and total phenolic content (TPC) (E) of different solvent extracts of wild rice collected from Jingzhou. Different letters within the same figure mean statistical difference ( $p < 0.05$ ). ....                                                                                           | 9  |
| <b>Figure S2.</b> Dynamic breakthrough curve of antioxidants on D101 resin column. ....                                                                                                                                                                                                                                                                                                                                           | 10 |
| <b>Figure S3.</b> Structures of phenolic compounds identified in wild rice. ....                                                                                                                                                                                                                                                                                                                                                  | 13 |
| <b>Figure S4.</b> Base peak chromatograms of Fr. 1 (A) and Fr. 2 (B) in HPLC-LTQ-Orbitrap-MS <sup>n</sup> analysis. ....                                                                                                                                                                                                                                                                                                          | 14 |
| <b>Figure S5.</b> HPLC fingerprint chromatograms at 360 nm (A) and 280 nm (B) of the four fractions (Frs. 1–4) eluted from D101 resin column. The gradient solvent system consisting of A (methanol) and B (water containing 0.1% acetic acid, <i>v/v</i> ) was as follows: 0–10 min, 5–10% A; 10–30 min, 10–15% A; 30–40 min, 15–20% A; 40–50 min, 20–25% A; 50–60 min, 25–35% A; 60–70 min, 35–90% A; 70–80 min, 90–60% A. .... | 15 |

**Table S1.** Phenolic acids and flavonoids found in wild rice in previous reports.

| Compound                                    | Species            | Collection Region of Sample                       | Identification Method | Reference |
|---------------------------------------------|--------------------|---------------------------------------------------|-----------------------|-----------|
| <i>Phenolic acids and their derivatives</i> |                    |                                                   |                       |           |
| <i>Trans</i> -ferulic acid                  | <i>Z. aquatica</i> | North-Ontario and Saskatchewan, Canada            | HPLC                  | [1]       |
| <i>Cis</i> -ferulic acid                    |                    |                                                   |                       |           |
| Ferulic acid                                | <i>Z. aquatica</i> | Dinorwic, Ontario, Canada and Houston, Texas, USA | HPLC-MS/MS            | [2]       |
|                                             |                    | Canada, Greece, Hungary, Cambodia                 | HPLC                  | [3]       |
| Chlorogenic acid                            | <i>Z. aquatica</i> | Canada, Greece, Hungary, Cambodia                 | HPLC                  | [3]       |
| Caffeic acid                                |                    |                                                   |                       |           |
| Gallic acid                                 |                    |                                                   |                       |           |
| Ellagic acid                                |                    |                                                   |                       |           |
| <i>o</i> -Coumaric acid                     |                    |                                                   |                       |           |
| Protocatechuic acid ethyl ester             |                    |                                                   |                       |           |
| Cinnamic acid                               |                    |                                                   |                       |           |
| <i>Trans-p</i> -coumaric acid               | <i>Z. aquatica</i> | North-Ontario and Saskatchewan, Canada            | HPLC                  | [1]       |
| <i>Cis-p</i> -coumaric acid                 |                    |                                                   |                       |           |
| <i>p</i> -Coumaric acid                     | <i>Z. aquatica</i> | Dinorwic, Ontario, Canada and Houston, Texas, USA | HPLC-MS/MS            | [2]       |
|                                             |                    | Canada, Greece, Hungary, Cambodia                 | HPLC                  | [3]       |
| <i>Trans</i> -sinapic acid                  | <i>Z. aquatica</i> | North-Ontario and Saskatchewan, Canada            | HPLC                  | [1]       |
| Sinapic acid                                |                    |                                                   |                       |           |
|                                             | <i>Z. aquatica</i> | Dinorwic, Ontario, Canada and Houston, Texas, USA | HPLC-MS/MS            | [2]       |
|                                             |                    | Canada, Greece, Hungary, Cambodia                 | HPLC                  | [3]       |
| <i>p</i> -Hydroxybenzoic acid               | <i>Z. aquatica</i> | North-Ontario and Saskatchewan, Canada            | HPLC                  | [1]       |
|                                             |                    | Dinorwic, Ontario, Canada and Houston, Texas, USA | HPLC-MS/MS            | [2]       |
|                                             |                    | Canada, Greece, Hungary, Cambodia                 | HPLC                  | [3]       |

|                                                                                                                                                                                                                                       |                    |                                                   |            |     |
|---------------------------------------------------------------------------------------------------------------------------------------------------------------------------------------------------------------------------------------|--------------------|---------------------------------------------------|------------|-----|
|                                                                                                                                                                                                                                       |                    | Cambodia                                          |            |     |
| Protocatechuic acid                                                                                                                                                                                                                   | <i>Z. aquatica</i> | North-Ontario and Saskatchewan, Canada            | HPLC       | [1] |
|                                                                                                                                                                                                                                       |                    | Canada, Greece, Hungary, Cambodia                 | HPLC       | [3] |
| Vanillic acid                                                                                                                                                                                                                         | <i>Z. aquatica</i> | North-Ontario and Saskatchewan, Canada            | HPLC       | [1] |
|                                                                                                                                                                                                                                       |                    | Dinorwic, Ontario, Canada and Houston, Texas, USA | HPLC-MS/MS | [2] |
|                                                                                                                                                                                                                                       |                    | Canada, Greece, Hungary, Cambodia                 | HPLC       | [3] |
| Syringic acid                                                                                                                                                                                                                         | <i>Z. aquatica</i> | North-Ontario and Saskatchewan, Canada            | HPLC       | [1] |
|                                                                                                                                                                                                                                       |                    | Dinorwic, Ontario, Canada and Houston, Texas, USA | HPLC-MS/MS | [2] |
|                                                                                                                                                                                                                                       |                    | Canada, Greece, Hungary, Cambodia                 | HPLC       | [3] |
| <i>p</i> -Hydroxybenzaldehyde                                                                                                                                                                                                         | <i>Z. aquatica</i> | North-Ontario and Saskatchewan, Canada            | HPLC       | [1] |
|                                                                                                                                                                                                                                       |                    | Dinorwic, Ontario, Canada and Houston, Texas, USA | HPLC-MS/MS | [2] |
| Protocatechuic aldehyde                                                                                                                                                                                                               | <i>Z. aquatica</i> | North-Ontario and Saskatchewan, Canada            | HPLC       | [1] |
| Vanillin                                                                                                                                                                                                                              | <i>Z. aquatica</i> | North-Ontario and Saskatchewan, Canada            | HPLC       | [1] |
|                                                                                                                                                                                                                                       |                    | Dinorwic, Ontario, Canada and Houston, Texas, USA | HPLC-MS/MS | [2] |
| <i>O</i> - $\beta$ -D-xylopyranosyl-(1 $\rightarrow$ 4)- <i>O</i> -[5- <i>O</i> -( <i>trans</i> -feruloyl)- $\alpha$ -L-arabinofuranosyl-(1 $\rightarrow$ 3)]- <i>O</i> - $\beta$ -D-xylopyranosyl-(1 $\rightarrow$ 4)-D-xylopyranose | <i>Z. aquatica</i> | North-Ontario and Saskatchewan, Canada            | MS, NMR    | [1] |
| {[5- <i>O</i> -( <i>transferuloyl</i> )]- <i>O</i> - $\beta$ -D-xylopyranosyl                                                                                                                                                         |                    |                                                   |            |     |

|                                                                                                                           |                    |                                                                                                     |                                |            |
|---------------------------------------------------------------------------------------------------------------------------|--------------------|-----------------------------------------------------------------------------------------------------|--------------------------------|------------|
| -[1→<br>2)]-O-α-L-arabinofur<br>anosyl-(1→<br>3)]-O-β-D-xylopyran<br>osyl-(1→4)-D-xyl<br>opyranose                        |                    |                                                                                                     |                                |            |
| O-[5-O-( <i>trans</i> -feruloy<br>l)-α-L-arabinofuranos<br>yl]-(1→3)-<br>O-β-D-xylopyranosyl<br>-(1→<br>4)-D-xylopyranose |                    |                                                                                                     |                                |            |
| D-xylopyranosyl-(1<br>→<br>2)-[5-O-( <i>trans</i> -feruloy<br>l)-L-arabinofuranose                                        |                    |                                                                                                     |                                |            |
| 5-O-( <i>trans</i> -feruloyl)-L<br>-arabinofuranose                                                                       |                    |                                                                                                     |                                |            |
| Cyclic form of<br>8–8-coupled<br>dehydrodiferulic<br>acid                                                                 | <i>Z. aquatica</i> | obtained from a local<br>German supplier                                                            | GC-MS,<br>GC-FID               | [4]        |
| Noncyclic form of<br>8–8-coupled<br>dehydrodiferulic<br>acid                                                              | <i>Z. aquatica</i> | obtained from a local<br>German supplier<br>Dinorwic, Ontario,<br>Canada and Houston,<br>Texas, USA | GC-MS,<br>GC-FID<br>HPLC-MS/MS | [4]<br>[2] |
| Cyclic form of<br>8–8-coupled<br>dehydrodisinapic<br>acid (thomasidioic<br>acid)                                          | <i>Z. aquatica</i> | obtained from a local<br>German supplier<br>Dinorwic, Ontario,<br>Canada and Houston,<br>Texas, USA | GC-MS,<br>GC-FID<br>HPLC-MS/MS | [4]<br>[2] |
| Noncyclic form of<br>8–5-coupled<br>dehydrodiferulic<br>acid                                                              | <i>Z. aquatica</i> | obtained from a local<br>German supplier                                                            | GC-MS,<br>GC-FID               | [4]        |
| Noncyclic form of<br>8–8/7–O–7-coupled<br>dehydrodiferulic<br>acid                                                        |                    |                                                                                                     |                                |            |
| Noncyclic form of<br>8–8-coupled                                                                                          | <i>Z. aquatica</i> | obtained from a local<br>German supplier                                                            | GC-MS,<br>GC-FID               | [4]        |

|                                                                    |                                             |                                                   |               |     |
|--------------------------------------------------------------------|---------------------------------------------|---------------------------------------------------|---------------|-----|
| dehydrodisinapic acid                                              |                                             | Dinorwic, Ontario, Canada and Houston, Texas, USA | HPLC-MS/MS    | [2] |
| 8-O-4-coupled dehydrodiferulic acid                                | <i>Z. aquatica</i>                          | obtained from a local German supplier             | GC-MS, GC-FID | [4] |
|                                                                    |                                             | Dinorwic, Ontario, Canada and Houston, Texas, USA | HPLC-MS/MS    | [2] |
| Cyclic form of 8-5-coupled dehydrodiferulic acid                   | <i>Z. aquatica</i>                          | obtained from a local German supplier             | GC-MS, GC-FID | [4] |
|                                                                    |                                             | Dinorwic, Ontario, Canada and Houston, Texas, USA | HPLC-MS/MS    | [2] |
| 5-5-Coupled dehydrodiferulic acid                                  | <i>Z. aquatica</i>                          | obtained from a local German supplier             | GC-MS, GC-FID | [4] |
|                                                                    |                                             | Dinorwic, Ontario, Canada and Houston, Texas, USA | HPLC-MS/MS    | [2] |
| Decarboxylated noncyclic form of 8-5-coupled dehydrodiferulic acid | <i>Z. aquatica</i>                          | obtained from a local German supplier             | GC-MS, GC-FID | [4] |
| <i>Flavonoids</i>                                                  |                                             |                                                   |               |     |
| 6,8-Di-C-glucosyl apigenin                                         | <i>Z. palustris</i> ,<br><i>Z. aquatica</i> | Wabigoon Lake, northwestern Ontario, Canada       | HPLC-MS/MS    | [5] |
| 6-C-Glucosyl-8-C-arabinosyl apigenin                               |                                             |                                                   |               |     |
| 6,8-Di-C-arabinosyl apigenin                                       |                                             |                                                   |               |     |
| Procyanidin dimer                                                  |                                             |                                                   |               |     |
| Procyanidin trimer                                                 |                                             |                                                   |               |     |
| Procyanidin tetramer                                               |                                             |                                                   |               |     |
| Procyanidin pentamer                                               |                                             |                                                   |               |     |
| Catechin                                                           | <i>Z. palustris</i> ,<br><i>Z. aquatica</i> | Wabigoon Lake, northwestern Ontario, Canada       | HPLC-MS/MS    | [5] |
|                                                                    | <i>Z. aquatica</i>                          | Canada, Greece, Hungary,                          | HPLC          | [3] |

| Cambodia         |                                             |                                                   |            |     |
|------------------|---------------------------------------------|---------------------------------------------------|------------|-----|
| Epicatechin      | <i>Z. palustris</i> ,<br><i>Z. aquatica</i> | Wabigoon Lake,<br>northwestern Ontario,<br>Canada | HPLC-MS/MS | [5] |
|                  | <i>Z. aquatica</i>                          | Canada, Greece, Hungary,<br>Cambodia              | HPLC       | [3] |
| Epigallocatechin | <i>Z. aquatica</i>                          | Canada, Greece, Hungary,<br>Cambodia              | HPLC       | [3] |
| Rutin            |                                             |                                                   |            |     |
| Quercetin        |                                             |                                                   |            |     |
| Kaempferol       |                                             |                                                   |            |     |

**Table S2.** Physical properties of six macroporous resins.

| <b>Resin</b> | <b>Polarity</b> | <b>Particle Size<br/>(mm)</b> | <b>Surface Area<br/>(m<sup>2</sup>/g)</b> | <b>Average Pore<br/>Diameter (Å)</b> |
|--------------|-----------------|-------------------------------|-------------------------------------------|--------------------------------------|
| HPD600       | Polar           | 0.30 – 1.20                   | 550 – 600                                 | 80                                   |
| NKA-9        | Polar           | 0.30 – 1.25                   | 250 – 290                                 | 155 – 165                            |
| AB-8         | Weak-polar      | 0.03 – 1.25                   | 480 – 520                                 | 130 – 140                            |
| X-5          | Non-polar       | 0.30 – 1.25                   | 500 – 600                                 | 290 – 300                            |
| D101         | Non-polar       | 0.30 – 1.25                   | 550 – 600                                 | 90 – 100                             |
| HPD300       | Non-polar       | 0.30 – 1.20                   | 800 – 870                                 | 50 – 55                              |

**Table S3.** The ion transitions, optimized MS parameters, and linear relationships of standards in UPLC-QqQ-MS/MS analysis.

| Compound                        | Parent Ion (m/z) | Product Ion (m/z) | Collision Energy (V) | $t_R^a$ (min) | Calibration Curve <sup>b</sup>                  | $r^2$  | LOD <sup>c</sup> (ng/mL) | LOQ <sup>d</sup> (ng/mL) |                               |         |        |    |      |                                                 |        |       |        |        |    |        |    |          |         |        |    |      |                                                 |        |       |        |        |    |         |    |         |    |                     |         |        |    |      |                                                 |        |       |       |         |    |         |    |                         |         |        |    |      |                                                 |        |       |        |         |    |         |    |                         |         |        |    |      |                                                 |        |       |        |         |    |         |    |               |         |        |    |      |                                                 |        |       |        |         |    |         |    |         |    |             |         |        |    |      |                                                 |        |       |       |        |    |         |    |         |    |                                 |         |         |    |      |                                                 |        |       |       |         |    |         |    |              |         |         |    |      |                                                 |        |       |        |         |    |         |    |         |    |               |         |        |    |
|---------------------------------|------------------|-------------------|----------------------|---------------|-------------------------------------------------|--------|--------------------------|--------------------------|-------------------------------|---------|--------|----|------|-------------------------------------------------|--------|-------|--------|--------|----|--------|----|----------|---------|--------|----|------|-------------------------------------------------|--------|-------|--------|--------|----|---------|----|---------|----|---------------------|---------|--------|----|------|-------------------------------------------------|--------|-------|-------|---------|----|---------|----|-------------------------|---------|--------|----|------|-------------------------------------------------|--------|-------|--------|---------|----|---------|----|-------------------------|---------|--------|----|------|-------------------------------------------------|--------|-------|--------|---------|----|---------|----|---------------|---------|--------|----|------|-------------------------------------------------|--------|-------|--------|---------|----|---------|----|---------|----|-------------|---------|--------|----|------|-------------------------------------------------|--------|-------|-------|--------|----|---------|----|---------|----|---------------------------------|---------|---------|----|------|-------------------------------------------------|--------|-------|-------|---------|----|---------|----|--------------|---------|---------|----|------|-------------------------------------------------|--------|-------|--------|---------|----|---------|----|---------|----|---------------|---------|--------|----|
| <i>p</i> -Hydroxybenzaldehyde   | 121.138          | 92.224            | 25                   | 2.91          | $y = 8.2754 \times 10^4 x + 5.1399 \times 10^4$ | 0.9991 | 0.992                    | 3.298                    |                               |         |        |    |      |                                                 |        |       |        |        |    |        |    |          |         |        |    |      |                                                 |        |       |        |        |    |         |    |         |    |                     |         |        |    |      |                                                 |        |       |       |         |    |         |    |                         |         |        |    |      |                                                 |        |       |        |         |    |         |    |                         |         |        |    |      |                                                 |        |       |        |         |    |         |    |               |         |        |    |      |                                                 |        |       |        |         |    |         |    |         |    |             |         |        |    |      |                                                 |        |       |       |        |    |         |    |         |    |                                 |         |         |    |      |                                                 |        |       |       |         |    |         |    |              |         |         |    |      |                                                 |        |       |        |         |    |         |    |         |    |               |         |        |    |
|                                 |                  | 120.306           | 20                   |               |                                                 |        |                          |                          | <i>p</i> -Hydroxybenzoic acid | 137.116 | 65.238 | 31 | 2.03 | $y = 2.3214 \times 10^5 x - 3.1002 \times 10^5$ | 0.9982 | 4.691 | 14.539 | 75.046 | 32 | 93.220 | 17 | Vanillin | 151.120 | 51.600 | 50 | 4.05 | $y = 6.5972 \times 10^5 x - 5.8837 \times 10^5$ | 0.9981 | 6.936 | 20.013 | 92.239 | 23 | 107.962 | 25 | 136.138 | 16 | Protocatechuic acid | 153.095 | 91.099 | 27 | 1.01 | $y = 7.4267 \times 10^4 x - 9.8661 \times 10^3$ | 0.9995 | 0.770 | 2.566 | 108.084 | 26 | 109.179 | 17 | <i>p</i> -Coumaric acid | 163.080 | 93.221 | 37 | 3.18 | $y = 4.4936 \times 10^5 x - 6.9351 \times 10^5$ | 0.9999 | 3.393 | 10.643 | 117.187 | 37 | 119.199 | 18 | <i>o</i> -Coumaric acid | 163.095 | 93.047 | 36 | 6.11 | $y = 2.8759 \times 10^5 x + 3.9233 \times 10^5$ | 0.9988 | 5.075 | 16.251 | 117.171 | 25 | 119.185 | 15 | Vanillic acid | 167.042 | 91.078 | 22 | 2.84 | $y = 2.0862 \times 10^5 x - 3.1034 \times 10^5$ | 0.9993 | 6.294 | 19.648 | 108.118 | 19 | 123.106 | 13 | 152.027 | 16 | Gallic acid | 169.081 | 79.288 | 24 | 0.61 | $y = 7.3772 \times 10^4 x - 3.4494 \times 10^4$ | 0.9994 | 2.589 | 8.630 | 97.217 | 20 | 124.132 | 27 | 125.176 | 15 | Protocatechuic acid ethyl ester | 181.038 | 108.487 | 23 | 7.39 | $y = 5.9352 \times 10^4 x + 2.5769 \times 10^6$ | 0.9992 | 0.147 | 0.491 | 151.949 | 16 | 153.005 | 16 | Ferulic acid | 193.081 | 133.097 | 30 | 5.16 | $y = 5.8092 \times 10^4 x - 4.0636 \times 10^4$ | 0.9982 | 3.321 | 11.088 | 134.166 | 18 | 149.184 | 13 | 178.117 | 14 | Syringic acid | 197.084 | 95.222 | 35 |
| <i>p</i> -Hydroxybenzoic acid   | 137.116          | 65.238            | 31                   | 2.03          | $y = 2.3214 \times 10^5 x - 3.1002 \times 10^5$ | 0.9982 | 4.691                    | 14.539                   |                               |         |        |    |      |                                                 |        |       |        |        |    |        |    |          |         |        |    |      |                                                 |        |       |        |        |    |         |    |         |    |                     |         |        |    |      |                                                 |        |       |       |         |    |         |    |                         |         |        |    |      |                                                 |        |       |        |         |    |         |    |                         |         |        |    |      |                                                 |        |       |        |         |    |         |    |               |         |        |    |      |                                                 |        |       |        |         |    |         |    |         |    |             |         |        |    |      |                                                 |        |       |       |        |    |         |    |         |    |                                 |         |         |    |      |                                                 |        |       |       |         |    |         |    |              |         |         |    |      |                                                 |        |       |        |         |    |         |    |         |    |               |         |        |    |
|                                 |                  | 75.046            | 32                   |               |                                                 |        |                          |                          |                               |         |        |    |      |                                                 |        |       |        |        |    |        |    |          |         |        |    |      |                                                 |        |       |        |        |    |         |    |         |    |                     |         |        |    |      |                                                 |        |       |       |         |    |         |    |                         |         |        |    |      |                                                 |        |       |        |         |    |         |    |                         |         |        |    |      |                                                 |        |       |        |         |    |         |    |               |         |        |    |      |                                                 |        |       |        |         |    |         |    |         |    |             |         |        |    |      |                                                 |        |       |       |        |    |         |    |         |    |                                 |         |         |    |      |                                                 |        |       |       |         |    |         |    |              |         |         |    |      |                                                 |        |       |        |         |    |         |    |         |    |               |         |        |    |
|                                 |                  | 93.220            | 17                   |               |                                                 |        |                          |                          |                               |         |        |    |      |                                                 |        |       |        |        |    |        |    |          |         |        |    |      |                                                 |        |       |        |        |    |         |    |         |    |                     |         |        |    |      |                                                 |        |       |       |         |    |         |    |                         |         |        |    |      |                                                 |        |       |        |         |    |         |    |                         |         |        |    |      |                                                 |        |       |        |         |    |         |    |               |         |        |    |      |                                                 |        |       |        |         |    |         |    |         |    |             |         |        |    |      |                                                 |        |       |       |        |    |         |    |         |    |                                 |         |         |    |      |                                                 |        |       |       |         |    |         |    |              |         |         |    |      |                                                 |        |       |        |         |    |         |    |         |    |               |         |        |    |
| Vanillin                        | 151.120          | 51.600            | 50                   | 4.05          | $y = 6.5972 \times 10^5 x - 5.8837 \times 10^5$ | 0.9981 | 6.936                    | 20.013                   |                               |         |        |    |      |                                                 |        |       |        |        |    |        |    |          |         |        |    |      |                                                 |        |       |        |        |    |         |    |         |    |                     |         |        |    |      |                                                 |        |       |       |         |    |         |    |                         |         |        |    |      |                                                 |        |       |        |         |    |         |    |                         |         |        |    |      |                                                 |        |       |        |         |    |         |    |               |         |        |    |      |                                                 |        |       |        |         |    |         |    |         |    |             |         |        |    |      |                                                 |        |       |       |        |    |         |    |         |    |                                 |         |         |    |      |                                                 |        |       |       |         |    |         |    |              |         |         |    |      |                                                 |        |       |        |         |    |         |    |         |    |               |         |        |    |
|                                 |                  | 92.239            | 23                   |               |                                                 |        |                          |                          |                               |         |        |    |      |                                                 |        |       |        |        |    |        |    |          |         |        |    |      |                                                 |        |       |        |        |    |         |    |         |    |                     |         |        |    |      |                                                 |        |       |       |         |    |         |    |                         |         |        |    |      |                                                 |        |       |        |         |    |         |    |                         |         |        |    |      |                                                 |        |       |        |         |    |         |    |               |         |        |    |      |                                                 |        |       |        |         |    |         |    |         |    |             |         |        |    |      |                                                 |        |       |       |        |    |         |    |         |    |                                 |         |         |    |      |                                                 |        |       |       |         |    |         |    |              |         |         |    |      |                                                 |        |       |        |         |    |         |    |         |    |               |         |        |    |
|                                 |                  | 107.962           | 25                   |               |                                                 |        |                          |                          |                               |         |        |    |      |                                                 |        |       |        |        |    |        |    |          |         |        |    |      |                                                 |        |       |        |        |    |         |    |         |    |                     |         |        |    |      |                                                 |        |       |       |         |    |         |    |                         |         |        |    |      |                                                 |        |       |        |         |    |         |    |                         |         |        |    |      |                                                 |        |       |        |         |    |         |    |               |         |        |    |      |                                                 |        |       |        |         |    |         |    |         |    |             |         |        |    |      |                                                 |        |       |       |        |    |         |    |         |    |                                 |         |         |    |      |                                                 |        |       |       |         |    |         |    |              |         |         |    |      |                                                 |        |       |        |         |    |         |    |         |    |               |         |        |    |
|                                 |                  | 136.138           | 16                   |               |                                                 |        |                          |                          |                               |         |        |    |      |                                                 |        |       |        |        |    |        |    |          |         |        |    |      |                                                 |        |       |        |        |    |         |    |         |    |                     |         |        |    |      |                                                 |        |       |       |         |    |         |    |                         |         |        |    |      |                                                 |        |       |        |         |    |         |    |                         |         |        |    |      |                                                 |        |       |        |         |    |         |    |               |         |        |    |      |                                                 |        |       |        |         |    |         |    |         |    |             |         |        |    |      |                                                 |        |       |       |        |    |         |    |         |    |                                 |         |         |    |      |                                                 |        |       |       |         |    |         |    |              |         |         |    |      |                                                 |        |       |        |         |    |         |    |         |    |               |         |        |    |
| Protocatechuic acid             | 153.095          | 91.099            | 27                   | 1.01          | $y = 7.4267 \times 10^4 x - 9.8661 \times 10^3$ | 0.9995 | 0.770                    | 2.566                    |                               |         |        |    |      |                                                 |        |       |        |        |    |        |    |          |         |        |    |      |                                                 |        |       |        |        |    |         |    |         |    |                     |         |        |    |      |                                                 |        |       |       |         |    |         |    |                         |         |        |    |      |                                                 |        |       |        |         |    |         |    |                         |         |        |    |      |                                                 |        |       |        |         |    |         |    |               |         |        |    |      |                                                 |        |       |        |         |    |         |    |         |    |             |         |        |    |      |                                                 |        |       |       |        |    |         |    |         |    |                                 |         |         |    |      |                                                 |        |       |       |         |    |         |    |              |         |         |    |      |                                                 |        |       |        |         |    |         |    |         |    |               |         |        |    |
|                                 |                  | 108.084           | 26                   |               |                                                 |        |                          |                          |                               |         |        |    |      |                                                 |        |       |        |        |    |        |    |          |         |        |    |      |                                                 |        |       |        |        |    |         |    |         |    |                     |         |        |    |      |                                                 |        |       |       |         |    |         |    |                         |         |        |    |      |                                                 |        |       |        |         |    |         |    |                         |         |        |    |      |                                                 |        |       |        |         |    |         |    |               |         |        |    |      |                                                 |        |       |        |         |    |         |    |         |    |             |         |        |    |      |                                                 |        |       |       |        |    |         |    |         |    |                                 |         |         |    |      |                                                 |        |       |       |         |    |         |    |              |         |         |    |      |                                                 |        |       |        |         |    |         |    |         |    |               |         |        |    |
|                                 |                  | 109.179           | 17                   |               |                                                 |        |                          |                          |                               |         |        |    |      |                                                 |        |       |        |        |    |        |    |          |         |        |    |      |                                                 |        |       |        |        |    |         |    |         |    |                     |         |        |    |      |                                                 |        |       |       |         |    |         |    |                         |         |        |    |      |                                                 |        |       |        |         |    |         |    |                         |         |        |    |      |                                                 |        |       |        |         |    |         |    |               |         |        |    |      |                                                 |        |       |        |         |    |         |    |         |    |             |         |        |    |      |                                                 |        |       |       |        |    |         |    |         |    |                                 |         |         |    |      |                                                 |        |       |       |         |    |         |    |              |         |         |    |      |                                                 |        |       |        |         |    |         |    |         |    |               |         |        |    |
| <i>p</i> -Coumaric acid         | 163.080          | 93.221            | 37                   | 3.18          | $y = 4.4936 \times 10^5 x - 6.9351 \times 10^5$ | 0.9999 | 3.393                    | 10.643                   |                               |         |        |    |      |                                                 |        |       |        |        |    |        |    |          |         |        |    |      |                                                 |        |       |        |        |    |         |    |         |    |                     |         |        |    |      |                                                 |        |       |       |         |    |         |    |                         |         |        |    |      |                                                 |        |       |        |         |    |         |    |                         |         |        |    |      |                                                 |        |       |        |         |    |         |    |               |         |        |    |      |                                                 |        |       |        |         |    |         |    |         |    |             |         |        |    |      |                                                 |        |       |       |        |    |         |    |         |    |                                 |         |         |    |      |                                                 |        |       |       |         |    |         |    |              |         |         |    |      |                                                 |        |       |        |         |    |         |    |         |    |               |         |        |    |
|                                 |                  | 117.187           | 37                   |               |                                                 |        |                          |                          |                               |         |        |    |      |                                                 |        |       |        |        |    |        |    |          |         |        |    |      |                                                 |        |       |        |        |    |         |    |         |    |                     |         |        |    |      |                                                 |        |       |       |         |    |         |    |                         |         |        |    |      |                                                 |        |       |        |         |    |         |    |                         |         |        |    |      |                                                 |        |       |        |         |    |         |    |               |         |        |    |      |                                                 |        |       |        |         |    |         |    |         |    |             |         |        |    |      |                                                 |        |       |       |        |    |         |    |         |    |                                 |         |         |    |      |                                                 |        |       |       |         |    |         |    |              |         |         |    |      |                                                 |        |       |        |         |    |         |    |         |    |               |         |        |    |
|                                 |                  | 119.199           | 18                   |               |                                                 |        |                          |                          |                               |         |        |    |      |                                                 |        |       |        |        |    |        |    |          |         |        |    |      |                                                 |        |       |        |        |    |         |    |         |    |                     |         |        |    |      |                                                 |        |       |       |         |    |         |    |                         |         |        |    |      |                                                 |        |       |        |         |    |         |    |                         |         |        |    |      |                                                 |        |       |        |         |    |         |    |               |         |        |    |      |                                                 |        |       |        |         |    |         |    |         |    |             |         |        |    |      |                                                 |        |       |       |        |    |         |    |         |    |                                 |         |         |    |      |                                                 |        |       |       |         |    |         |    |              |         |         |    |      |                                                 |        |       |        |         |    |         |    |         |    |               |         |        |    |
| <i>o</i> -Coumaric acid         | 163.095          | 93.047            | 36                   | 6.11          | $y = 2.8759 \times 10^5 x + 3.9233 \times 10^5$ | 0.9988 | 5.075                    | 16.251                   |                               |         |        |    |      |                                                 |        |       |        |        |    |        |    |          |         |        |    |      |                                                 |        |       |        |        |    |         |    |         |    |                     |         |        |    |      |                                                 |        |       |       |         |    |         |    |                         |         |        |    |      |                                                 |        |       |        |         |    |         |    |                         |         |        |    |      |                                                 |        |       |        |         |    |         |    |               |         |        |    |      |                                                 |        |       |        |         |    |         |    |         |    |             |         |        |    |      |                                                 |        |       |       |        |    |         |    |         |    |                                 |         |         |    |      |                                                 |        |       |       |         |    |         |    |              |         |         |    |      |                                                 |        |       |        |         |    |         |    |         |    |               |         |        |    |
|                                 |                  | 117.171           | 25                   |               |                                                 |        |                          |                          |                               |         |        |    |      |                                                 |        |       |        |        |    |        |    |          |         |        |    |      |                                                 |        |       |        |        |    |         |    |         |    |                     |         |        |    |      |                                                 |        |       |       |         |    |         |    |                         |         |        |    |      |                                                 |        |       |        |         |    |         |    |                         |         |        |    |      |                                                 |        |       |        |         |    |         |    |               |         |        |    |      |                                                 |        |       |        |         |    |         |    |         |    |             |         |        |    |      |                                                 |        |       |       |        |    |         |    |         |    |                                 |         |         |    |      |                                                 |        |       |       |         |    |         |    |              |         |         |    |      |                                                 |        |       |        |         |    |         |    |         |    |               |         |        |    |
|                                 |                  | 119.185           | 15                   |               |                                                 |        |                          |                          |                               |         |        |    |      |                                                 |        |       |        |        |    |        |    |          |         |        |    |      |                                                 |        |       |        |        |    |         |    |         |    |                     |         |        |    |      |                                                 |        |       |       |         |    |         |    |                         |         |        |    |      |                                                 |        |       |        |         |    |         |    |                         |         |        |    |      |                                                 |        |       |        |         |    |         |    |               |         |        |    |      |                                                 |        |       |        |         |    |         |    |         |    |             |         |        |    |      |                                                 |        |       |       |        |    |         |    |         |    |                                 |         |         |    |      |                                                 |        |       |       |         |    |         |    |              |         |         |    |      |                                                 |        |       |        |         |    |         |    |         |    |               |         |        |    |
| Vanillic acid                   | 167.042          | 91.078            | 22                   | 2.84          | $y = 2.0862 \times 10^5 x - 3.1034 \times 10^5$ | 0.9993 | 6.294                    | 19.648                   |                               |         |        |    |      |                                                 |        |       |        |        |    |        |    |          |         |        |    |      |                                                 |        |       |        |        |    |         |    |         |    |                     |         |        |    |      |                                                 |        |       |       |         |    |         |    |                         |         |        |    |      |                                                 |        |       |        |         |    |         |    |                         |         |        |    |      |                                                 |        |       |        |         |    |         |    |               |         |        |    |      |                                                 |        |       |        |         |    |         |    |         |    |             |         |        |    |      |                                                 |        |       |       |        |    |         |    |         |    |                                 |         |         |    |      |                                                 |        |       |       |         |    |         |    |              |         |         |    |      |                                                 |        |       |        |         |    |         |    |         |    |               |         |        |    |
|                                 |                  | 108.118           | 19                   |               |                                                 |        |                          |                          |                               |         |        |    |      |                                                 |        |       |        |        |    |        |    |          |         |        |    |      |                                                 |        |       |        |        |    |         |    |         |    |                     |         |        |    |      |                                                 |        |       |       |         |    |         |    |                         |         |        |    |      |                                                 |        |       |        |         |    |         |    |                         |         |        |    |      |                                                 |        |       |        |         |    |         |    |               |         |        |    |      |                                                 |        |       |        |         |    |         |    |         |    |             |         |        |    |      |                                                 |        |       |       |        |    |         |    |         |    |                                 |         |         |    |      |                                                 |        |       |       |         |    |         |    |              |         |         |    |      |                                                 |        |       |        |         |    |         |    |         |    |               |         |        |    |
|                                 |                  | 123.106           | 13                   |               |                                                 |        |                          |                          |                               |         |        |    |      |                                                 |        |       |        |        |    |        |    |          |         |        |    |      |                                                 |        |       |        |        |    |         |    |         |    |                     |         |        |    |      |                                                 |        |       |       |         |    |         |    |                         |         |        |    |      |                                                 |        |       |        |         |    |         |    |                         |         |        |    |      |                                                 |        |       |        |         |    |         |    |               |         |        |    |      |                                                 |        |       |        |         |    |         |    |         |    |             |         |        |    |      |                                                 |        |       |       |        |    |         |    |         |    |                                 |         |         |    |      |                                                 |        |       |       |         |    |         |    |              |         |         |    |      |                                                 |        |       |        |         |    |         |    |         |    |               |         |        |    |
|                                 |                  | 152.027           | 16                   |               |                                                 |        |                          |                          |                               |         |        |    |      |                                                 |        |       |        |        |    |        |    |          |         |        |    |      |                                                 |        |       |        |        |    |         |    |         |    |                     |         |        |    |      |                                                 |        |       |       |         |    |         |    |                         |         |        |    |      |                                                 |        |       |        |         |    |         |    |                         |         |        |    |      |                                                 |        |       |        |         |    |         |    |               |         |        |    |      |                                                 |        |       |        |         |    |         |    |         |    |             |         |        |    |      |                                                 |        |       |       |        |    |         |    |         |    |                                 |         |         |    |      |                                                 |        |       |       |         |    |         |    |              |         |         |    |      |                                                 |        |       |        |         |    |         |    |         |    |               |         |        |    |
| Gallic acid                     | 169.081          | 79.288            | 24                   | 0.61          | $y = 7.3772 \times 10^4 x - 3.4494 \times 10^4$ | 0.9994 | 2.589                    | 8.630                    |                               |         |        |    |      |                                                 |        |       |        |        |    |        |    |          |         |        |    |      |                                                 |        |       |        |        |    |         |    |         |    |                     |         |        |    |      |                                                 |        |       |       |         |    |         |    |                         |         |        |    |      |                                                 |        |       |        |         |    |         |    |                         |         |        |    |      |                                                 |        |       |        |         |    |         |    |               |         |        |    |      |                                                 |        |       |        |         |    |         |    |         |    |             |         |        |    |      |                                                 |        |       |       |        |    |         |    |         |    |                                 |         |         |    |      |                                                 |        |       |       |         |    |         |    |              |         |         |    |      |                                                 |        |       |        |         |    |         |    |         |    |               |         |        |    |
|                                 |                  | 97.217            | 20                   |               |                                                 |        |                          |                          |                               |         |        |    |      |                                                 |        |       |        |        |    |        |    |          |         |        |    |      |                                                 |        |       |        |        |    |         |    |         |    |                     |         |        |    |      |                                                 |        |       |       |         |    |         |    |                         |         |        |    |      |                                                 |        |       |        |         |    |         |    |                         |         |        |    |      |                                                 |        |       |        |         |    |         |    |               |         |        |    |      |                                                 |        |       |        |         |    |         |    |         |    |             |         |        |    |      |                                                 |        |       |       |        |    |         |    |         |    |                                 |         |         |    |      |                                                 |        |       |       |         |    |         |    |              |         |         |    |      |                                                 |        |       |        |         |    |         |    |         |    |               |         |        |    |
|                                 |                  | 124.132           | 27                   |               |                                                 |        |                          |                          |                               |         |        |    |      |                                                 |        |       |        |        |    |        |    |          |         |        |    |      |                                                 |        |       |        |        |    |         |    |         |    |                     |         |        |    |      |                                                 |        |       |       |         |    |         |    |                         |         |        |    |      |                                                 |        |       |        |         |    |         |    |                         |         |        |    |      |                                                 |        |       |        |         |    |         |    |               |         |        |    |      |                                                 |        |       |        |         |    |         |    |         |    |             |         |        |    |      |                                                 |        |       |       |        |    |         |    |         |    |                                 |         |         |    |      |                                                 |        |       |       |         |    |         |    |              |         |         |    |      |                                                 |        |       |        |         |    |         |    |         |    |               |         |        |    |
|                                 |                  | 125.176           | 15                   |               |                                                 |        |                          |                          |                               |         |        |    |      |                                                 |        |       |        |        |    |        |    |          |         |        |    |      |                                                 |        |       |        |        |    |         |    |         |    |                     |         |        |    |      |                                                 |        |       |       |         |    |         |    |                         |         |        |    |      |                                                 |        |       |        |         |    |         |    |                         |         |        |    |      |                                                 |        |       |        |         |    |         |    |               |         |        |    |      |                                                 |        |       |        |         |    |         |    |         |    |             |         |        |    |      |                                                 |        |       |       |        |    |         |    |         |    |                                 |         |         |    |      |                                                 |        |       |       |         |    |         |    |              |         |         |    |      |                                                 |        |       |        |         |    |         |    |         |    |               |         |        |    |
| Protocatechuic acid ethyl ester | 181.038          | 108.487           | 23                   | 7.39          | $y = 5.9352 \times 10^4 x + 2.5769 \times 10^6$ | 0.9992 | 0.147                    | 0.491                    |                               |         |        |    |      |                                                 |        |       |        |        |    |        |    |          |         |        |    |      |                                                 |        |       |        |        |    |         |    |         |    |                     |         |        |    |      |                                                 |        |       |       |         |    |         |    |                         |         |        |    |      |                                                 |        |       |        |         |    |         |    |                         |         |        |    |      |                                                 |        |       |        |         |    |         |    |               |         |        |    |      |                                                 |        |       |        |         |    |         |    |         |    |             |         |        |    |      |                                                 |        |       |       |        |    |         |    |         |    |                                 |         |         |    |      |                                                 |        |       |       |         |    |         |    |              |         |         |    |      |                                                 |        |       |        |         |    |         |    |         |    |               |         |        |    |
|                                 |                  | 151.949           | 16                   |               |                                                 |        |                          |                          |                               |         |        |    |      |                                                 |        |       |        |        |    |        |    |          |         |        |    |      |                                                 |        |       |        |        |    |         |    |         |    |                     |         |        |    |      |                                                 |        |       |       |         |    |         |    |                         |         |        |    |      |                                                 |        |       |        |         |    |         |    |                         |         |        |    |      |                                                 |        |       |        |         |    |         |    |               |         |        |    |      |                                                 |        |       |        |         |    |         |    |         |    |             |         |        |    |      |                                                 |        |       |       |        |    |         |    |         |    |                                 |         |         |    |      |                                                 |        |       |       |         |    |         |    |              |         |         |    |      |                                                 |        |       |        |         |    |         |    |         |    |               |         |        |    |
|                                 |                  | 153.005           | 16                   |               |                                                 |        |                          |                          |                               |         |        |    |      |                                                 |        |       |        |        |    |        |    |          |         |        |    |      |                                                 |        |       |        |        |    |         |    |         |    |                     |         |        |    |      |                                                 |        |       |       |         |    |         |    |                         |         |        |    |      |                                                 |        |       |        |         |    |         |    |                         |         |        |    |      |                                                 |        |       |        |         |    |         |    |               |         |        |    |      |                                                 |        |       |        |         |    |         |    |         |    |             |         |        |    |      |                                                 |        |       |       |        |    |         |    |         |    |                                 |         |         |    |      |                                                 |        |       |       |         |    |         |    |              |         |         |    |      |                                                 |        |       |        |         |    |         |    |         |    |               |         |        |    |
| Ferulic acid                    | 193.081          | 133.097           | 30                   | 5.16          | $y = 5.8092 \times 10^4 x - 4.0636 \times 10^4$ | 0.9982 | 3.321                    | 11.088                   |                               |         |        |    |      |                                                 |        |       |        |        |    |        |    |          |         |        |    |      |                                                 |        |       |        |        |    |         |    |         |    |                     |         |        |    |      |                                                 |        |       |       |         |    |         |    |                         |         |        |    |      |                                                 |        |       |        |         |    |         |    |                         |         |        |    |      |                                                 |        |       |        |         |    |         |    |               |         |        |    |      |                                                 |        |       |        |         |    |         |    |         |    |             |         |        |    |      |                                                 |        |       |       |        |    |         |    |         |    |                                 |         |         |    |      |                                                 |        |       |       |         |    |         |    |              |         |         |    |      |                                                 |        |       |        |         |    |         |    |         |    |               |         |        |    |
|                                 |                  | 134.166           | 18                   |               |                                                 |        |                          |                          |                               |         |        |    |      |                                                 |        |       |        |        |    |        |    |          |         |        |    |      |                                                 |        |       |        |        |    |         |    |         |    |                     |         |        |    |      |                                                 |        |       |       |         |    |         |    |                         |         |        |    |      |                                                 |        |       |        |         |    |         |    |                         |         |        |    |      |                                                 |        |       |        |         |    |         |    |               |         |        |    |      |                                                 |        |       |        |         |    |         |    |         |    |             |         |        |    |      |                                                 |        |       |       |        |    |         |    |         |    |                                 |         |         |    |      |                                                 |        |       |       |         |    |         |    |              |         |         |    |      |                                                 |        |       |        |         |    |         |    |         |    |               |         |        |    |
|                                 |                  | 149.184           | 13                   |               |                                                 |        |                          |                          |                               |         |        |    |      |                                                 |        |       |        |        |    |        |    |          |         |        |    |      |                                                 |        |       |        |        |    |         |    |         |    |                     |         |        |    |      |                                                 |        |       |       |         |    |         |    |                         |         |        |    |      |                                                 |        |       |        |         |    |         |    |                         |         |        |    |      |                                                 |        |       |        |         |    |         |    |               |         |        |    |      |                                                 |        |       |        |         |    |         |    |         |    |             |         |        |    |      |                                                 |        |       |       |        |    |         |    |         |    |                                 |         |         |    |      |                                                 |        |       |       |         |    |         |    |              |         |         |    |      |                                                 |        |       |        |         |    |         |    |         |    |               |         |        |    |
|                                 |                  | 178.117           | 14                   |               |                                                 |        |                          |                          |                               |         |        |    |      |                                                 |        |       |        |        |    |        |    |          |         |        |    |      |                                                 |        |       |        |        |    |         |    |         |    |                     |         |        |    |      |                                                 |        |       |       |         |    |         |    |                         |         |        |    |      |                                                 |        |       |        |         |    |         |    |                         |         |        |    |      |                                                 |        |       |        |         |    |         |    |               |         |        |    |      |                                                 |        |       |        |         |    |         |    |         |    |             |         |        |    |      |                                                 |        |       |       |        |    |         |    |         |    |                                 |         |         |    |      |                                                 |        |       |       |         |    |         |    |              |         |         |    |      |                                                 |        |       |        |         |    |         |    |         |    |               |         |        |    |
| Syringic acid                   | 197.084          | 95.222            | 35                   | 3.36          | $y = 2.6176 \times 10^5 x - 4.1087 \times 10^5$ | 0.9996 | 6.213                    | 20.712                   |                               |         |        |    |      |                                                 |        |       |        |        |    |        |    |          |         |        |    |      |                                                 |        |       |        |        |    |         |    |         |    |                     |         |        |    |      |                                                 |        |       |       |         |    |         |    |                         |         |        |    |      |                                                 |        |       |        |         |    |         |    |                         |         |        |    |      |                                                 |        |       |        |         |    |         |    |               |         |        |    |      |                                                 |        |       |        |         |    |         |    |         |    |             |         |        |    |      |                                                 |        |       |       |        |    |         |    |         |    |                                 |         |         |    |      |                                                 |        |       |       |         |    |         |    |              |         |         |    |      |                                                 |        |       |        |         |    |         |    |         |    |               |         |        |    |
|                                 |                  | 123.166           | 25                   |               |                                                 |        |                          |                          |                               |         |        |    |      |                                                 |        |       |        |        |    |        |    |          |         |        |    |      |                                                 |        |       |        |        |    |         |    |         |    |                     |         |        |    |      |                                                 |        |       |       |         |    |         |    |                         |         |        |    |      |                                                 |        |       |        |         |    |         |    |                         |         |        |    |      |                                                 |        |       |        |         |    |         |    |               |         |        |    |      |                                                 |        |       |        |         |    |         |    |         |    |             |         |        |    |      |                                                 |        |       |       |        |    |         |    |         |    |                                 |         |         |    |      |                                                 |        |       |       |         |    |         |    |              |         |         |    |      |                                                 |        |       |        |         |    |         |    |         |    |               |         |        |    |



|                  |         |         |    |      |                                                 |        |       |        |
|------------------|---------|---------|----|------|-------------------------------------------------|--------|-------|--------|
|                  |         | 167.117 | 21 |      |                                                 |        |       |        |
|                  |         | 182.117 | 16 |      |                                                 |        |       |        |
| Sinapic acid     | 223.065 | 149.105 | 23 | 6.31 | $y = 3.1595 \times 10^5 x - 8.3289 \times 10^4$ | 0.9979 | 4.868 | 16.226 |
|                  |         | 164.141 | 18 |      |                                                 |        |       |        |
|                  |         | 193.081 | 25 |      |                                                 |        |       |        |
|                  |         | 208.100 | 17 |      |                                                 |        |       |        |
| Catechin         | 289.041 | 203.256 | 21 | 2.97 | $y = 1.3143 \times 10^4 x - 9.6578 \times 10^3$ | 0.9995 | 8.395 | 27.984 |
|                  |         | 245.129 | 17 |      |                                                 |        |       |        |
| Epicatechin      | 289.050 | 203.210 | 23 | 3.56 | $y = 2.1011 \times 10^4 x - 1.3420 \times 10^4$ | 0.9991 | 6.787 | 22.067 |
|                  |         | 245.137 | 18 |      |                                                 |        |       |        |
| Quercetin        | 301.000 | 107.184 | 33 | 7.92 | $y = 1.7855 \times 10^5 x - 5.8558 \times 10^4$ | 0.9997 | 0.297 | 0.991  |
|                  |         | 121.176 | 30 |      |                                                 |        |       |        |
|                  |         | 151.074 | 24 |      |                                                 |        |       |        |
|                  |         | 179.060 | 20 |      |                                                 |        |       |        |
| Epigallocatechin | 305.033 | 125.138 | 27 | 2.35 | $y = 3.9510 \times 10^4 x - 1.5239 \times 10^4$ | 0.9990 | 2.744 | 9.148  |
|                  |         | 165.082 | 20 |      |                                                 |        |       |        |
|                  |         | 179.110 | 18 |      |                                                 |        |       |        |
|                  |         | 219.098 | 19 |      |                                                 |        |       |        |
| Procyanidin B1   | 577.128 | 289.088 | 26 | 2.60 | $y = 9.1478 \times 10^4 x - 3.5465 \times 10^4$ | 0.9997 | 2.720 | 9.068  |
|                  |         | 407.009 | 23 |      |                                                 |        |       |        |
|                  |         | 425.148 | 18 |      |                                                 |        |       |        |
| Procyanidin B2   | 577.137 | 289.010 | 26 | 2.85 | $y = 1.1698 \times 10^5 x - 8.5724 \times 10^4$ | 0.9989 | 1.894 | 6.332  |
|                  |         | 407.002 | 24 |      |                                                 |        |       |        |
|                  |         | 425.159 | 19 |      |                                                 |        |       |        |
| Procyanidin B3   | 577.112 | 289.017 | 28 | 3.63 | $y = 1.0529 \times 10^5 x - 4.0134 \times 10^4$ | 0.9998 | 2.215 | 7.365  |
|                  |         | 407.021 | 24 |      |                                                 |        |       |        |
|                  |         | 425.098 | 17 |      |                                                 |        |       |        |
| Rutin            | 609.122 | 151.051 | 52 | 6.79 | $y = 2.5348 \times 10^6 x + 2.4363 \times 10^6$ | 0.9989 | 0.012 | 0.039  |
|                  |         | 255.055 | 58 |      |                                                 |        |       |        |
|                  |         | 271.093 | 57 |      |                                                 |        |       |        |
|                  |         | 300.142 | 40 |      |                                                 |        |       |        |
| Procyanidin C1   | 865.147 | 386.970 | 38 | 7.87 | $y = 8.0104 \times 10^4 x + 1.5888 \times 10^4$ | 0.9999 | 0.416 | 1.385  |
|                  |         | 524.985 | 29 |      |                                                 |        |       |        |
|                  |         | 695.291 | 26 |      |                                                 |        |       |        |
|                  |         | 713.302 | 29 |      |                                                 |        |       |        |

<sup>a</sup> $t_R$ , retention time. <sup>b</sup>The calibration curve was constructed by plotting the peak area versus the concentration of each standard. <sup>c</sup>LOD, limits of detection. <sup>d</sup>LOQ, limits of quantification. Precision of the data obtained from repeated experiments (RSD%) < 7%.

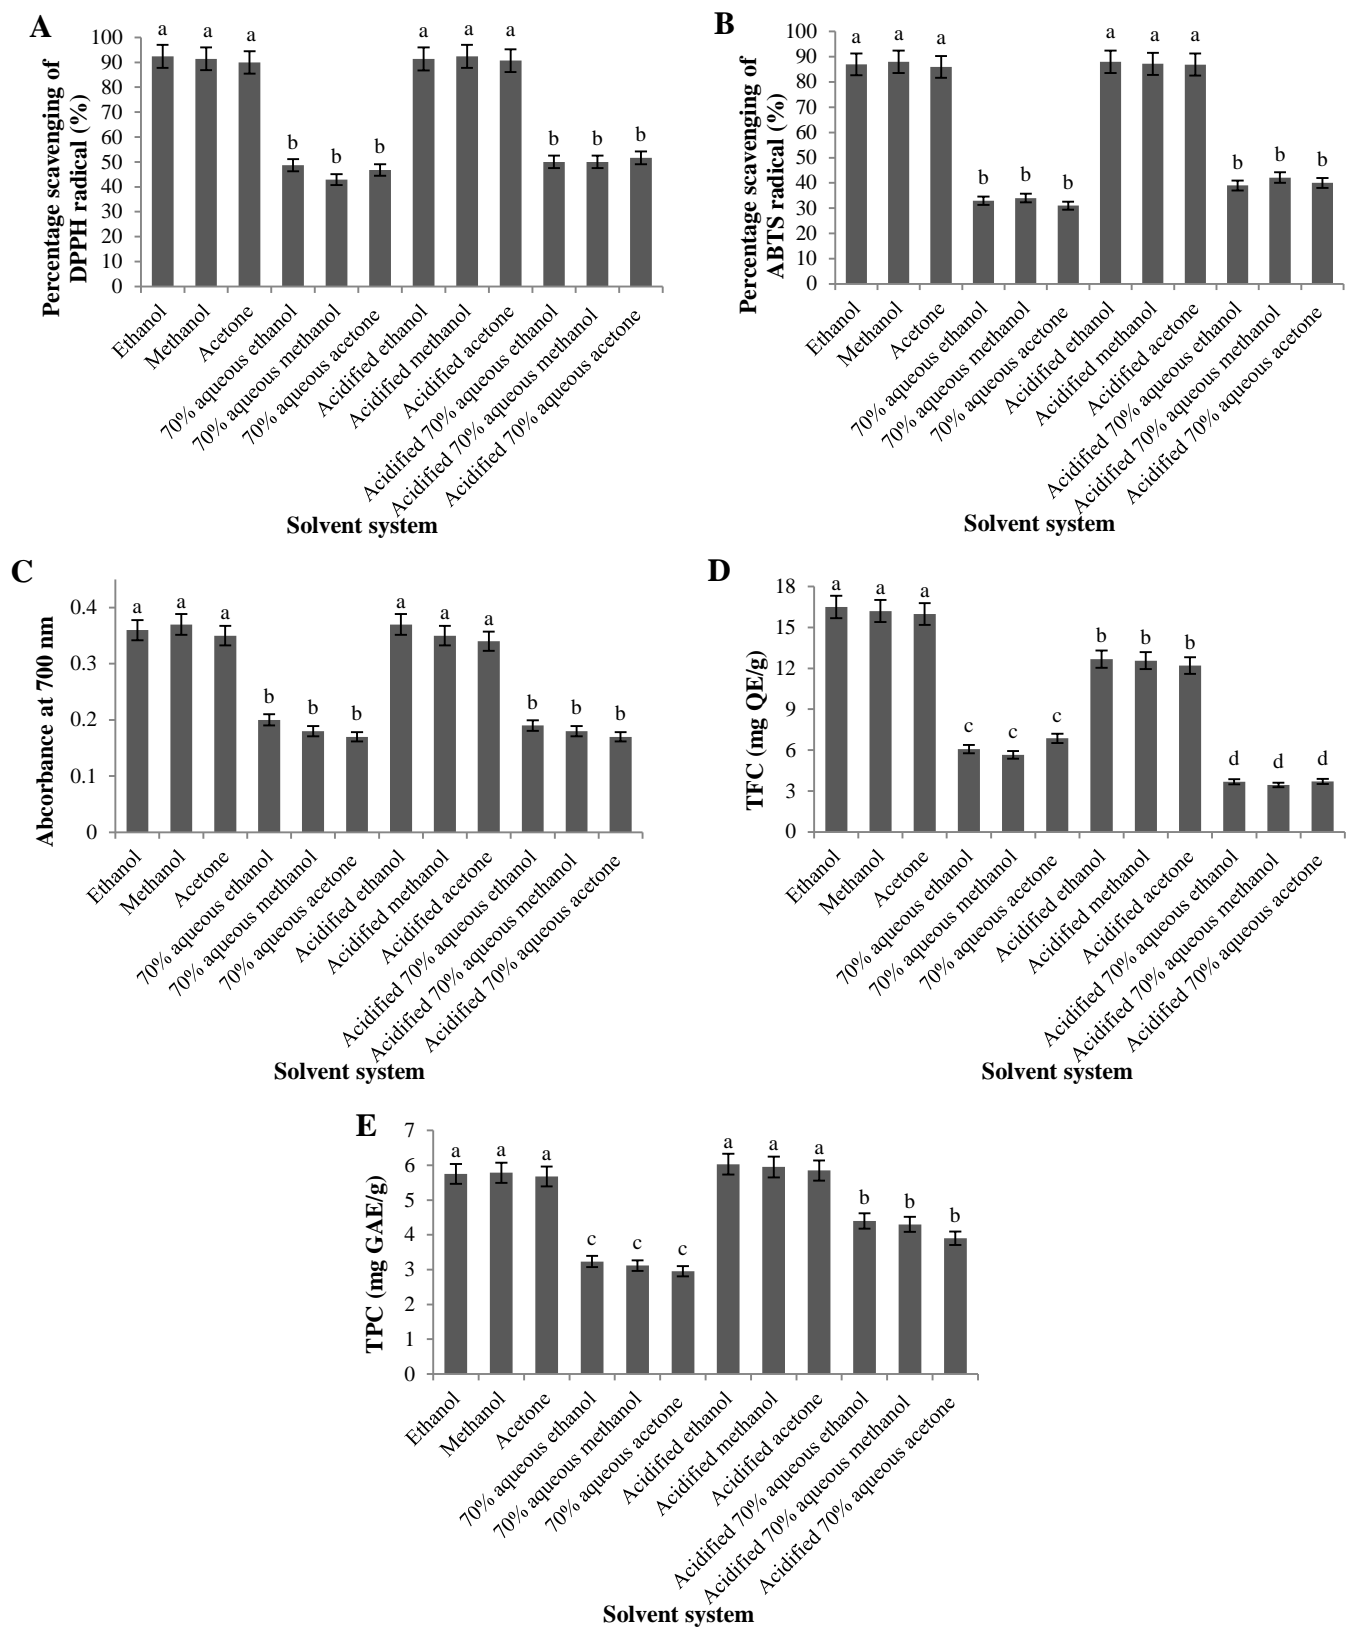

**Figure S1.** The radical scavenging activities of DPPH (A) and ABTS (B), reducing power (C), total flavonoid content (TFC) (D), and total phenolic content (TPC) (E) of different solvent extracts of wild rice collected from Jingzhou. Different letters within the same figure mean statistical difference ( $p < 0.05$ ).

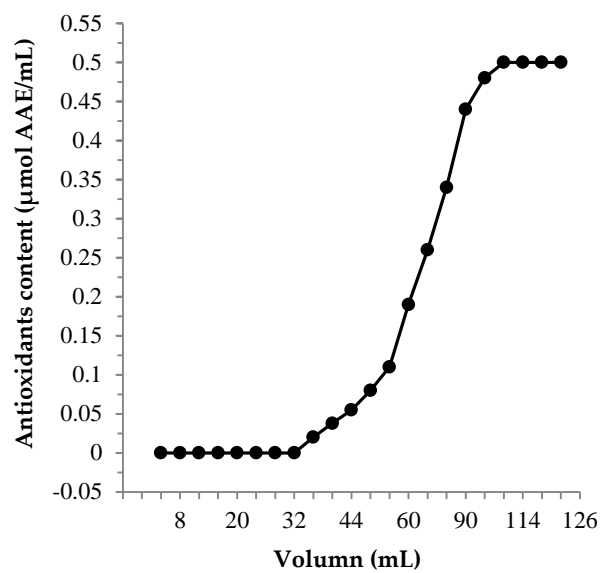

**Figure S2.** Dynamic breakthrough curve of antioxidants on D101 resin column.

Phenolic acids and their derivatives

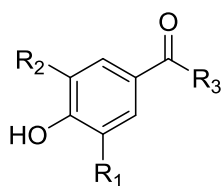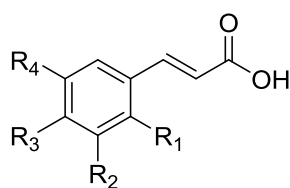

**A1:** R<sub>1</sub>=OH, R<sub>2</sub>=OH, R<sub>3</sub>=OH

**A2:** R<sub>1</sub>=H, R<sub>2</sub>=OH, R<sub>3</sub>=OH

**A3:** R<sub>1</sub>=H, R<sub>2</sub>=H, R<sub>3</sub>=OH

**A4:** R<sub>1</sub>=H, R<sub>2</sub>=OMe, R<sub>3</sub>=OH

**A5:** R<sub>1</sub>=H, R<sub>2</sub>=H, R<sub>3</sub>=H

**A6:** R<sub>1</sub>=OMe, R<sub>2</sub>=OMe, R<sub>3</sub>=OH

**A7:** R<sub>1</sub>=H, R<sub>2</sub>=OMe, R<sub>3</sub>=H

**A8:** R<sub>1</sub>=H, R<sub>2</sub>=OH, R<sub>3</sub>=OEt

**A9:** R<sub>1</sub>=H, R<sub>2</sub>=H, R<sub>3</sub>=OH, R<sub>4</sub>=H

**A10:** R<sub>1</sub>=OH, R<sub>2</sub>=H, R<sub>3</sub>=H, R<sub>4</sub>=H

**A11:** R<sub>1</sub>=H, R<sub>2</sub>=OMe, R<sub>3</sub>=OH, R<sub>4</sub>=H

**A12:** R<sub>1</sub>=H, R<sub>2</sub>=OMe, R<sub>3</sub>=OH, R<sub>4</sub>=OMe

**B21:** R<sub>1</sub>=H, R<sub>2</sub>=OMe, R<sub>3</sub>=OMe, R<sub>4</sub>=OMe

Procyanidins

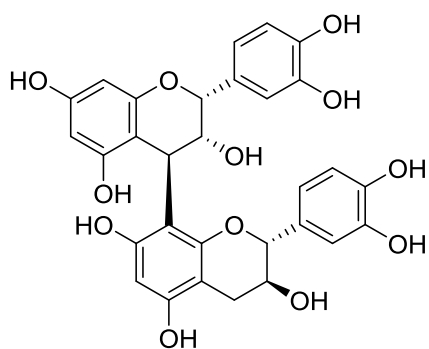

**B1**

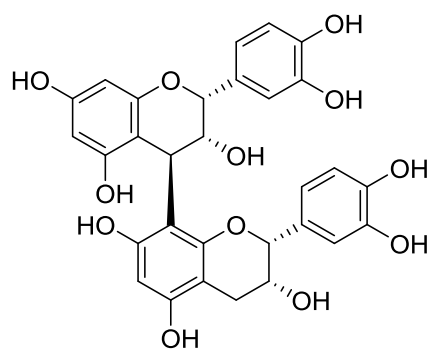

**B2**

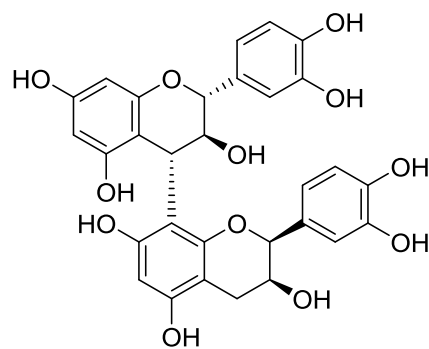

**B3**

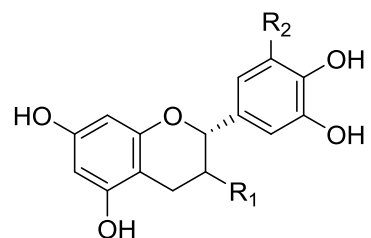

**B4:** R<sub>1</sub>= OH, R<sub>2</sub>=OH

**B5:** R<sub>1</sub>= OH, R<sub>2</sub>=H

**B6:** R<sub>1</sub>= OH, R<sub>2</sub>=H

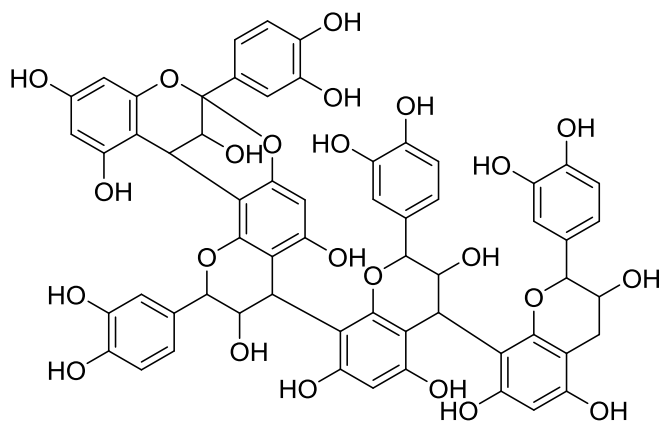

**B7**

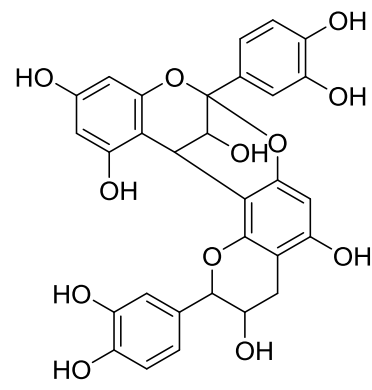

**B8**

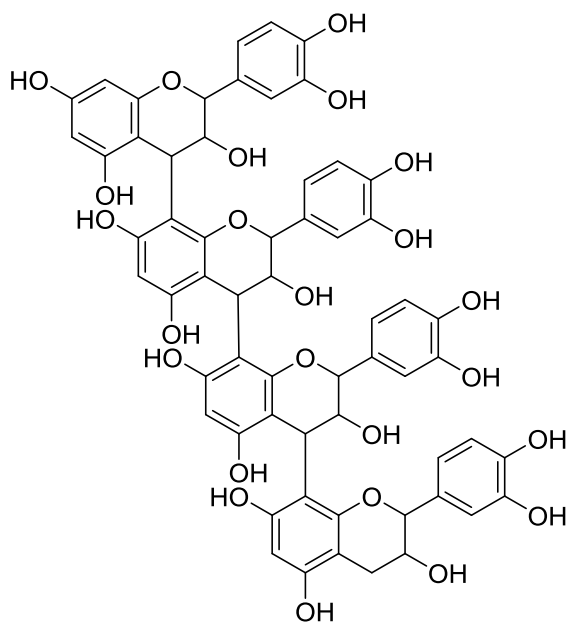

**B11**

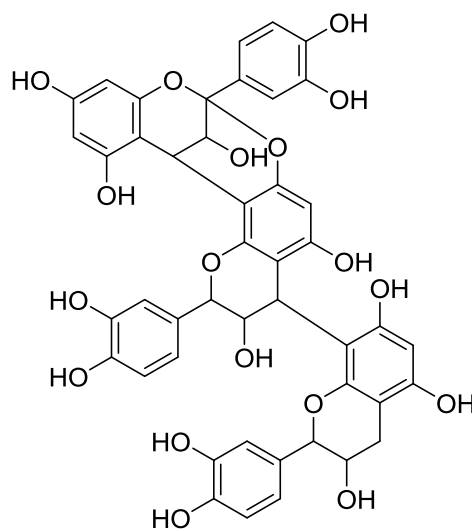

**B13**

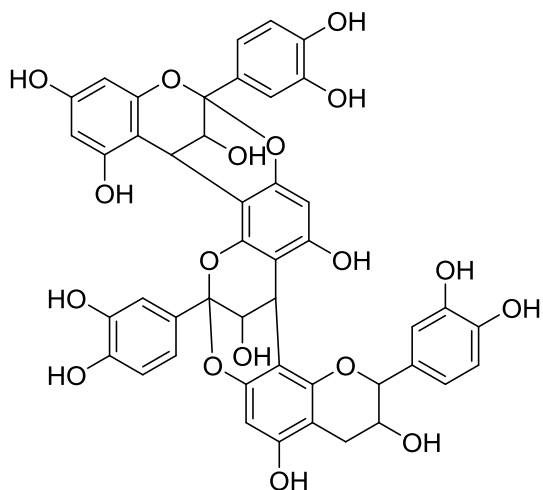

**B18**

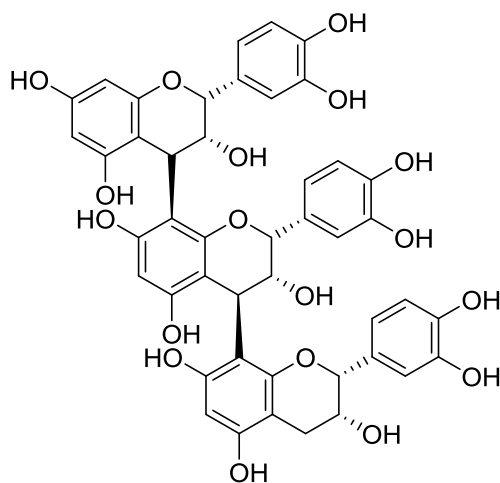

**B19**

*Flavonoid glycosides*

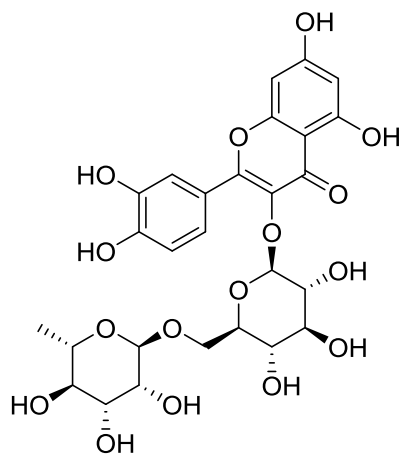

**B9**

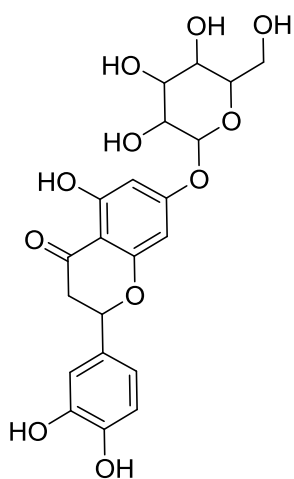

**B10**

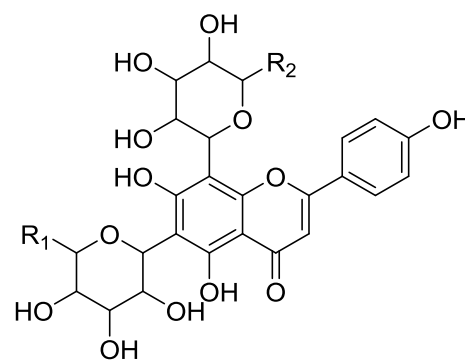

**B12:**  $R_1=CH_2OH$ ,  $R_2=CH_2OH$

**B15:**  $R_1=CH_2OH$ ,  $R_2=H$

**B16:**  $R_1=H$ ,  $R_2=CH_2OH$

**B17:**  $R_1=H$ ,  $R_2=H$

*Others*

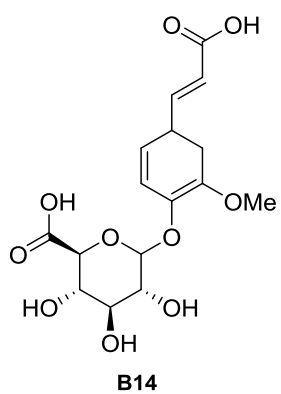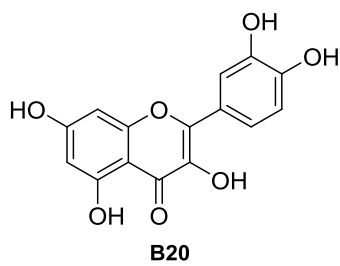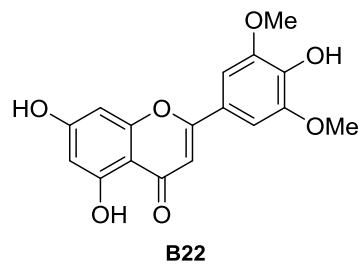

**Figure S3.** Structures of phenolic compounds identified in wild rice.

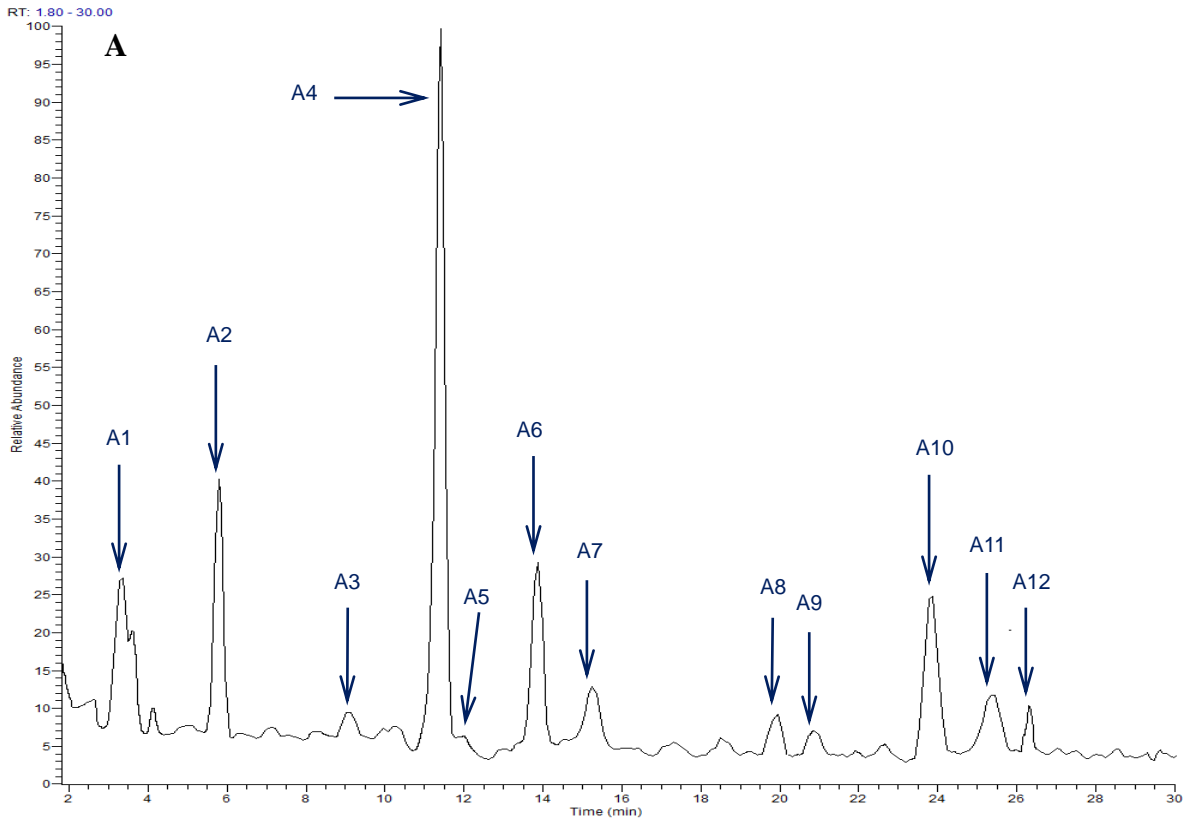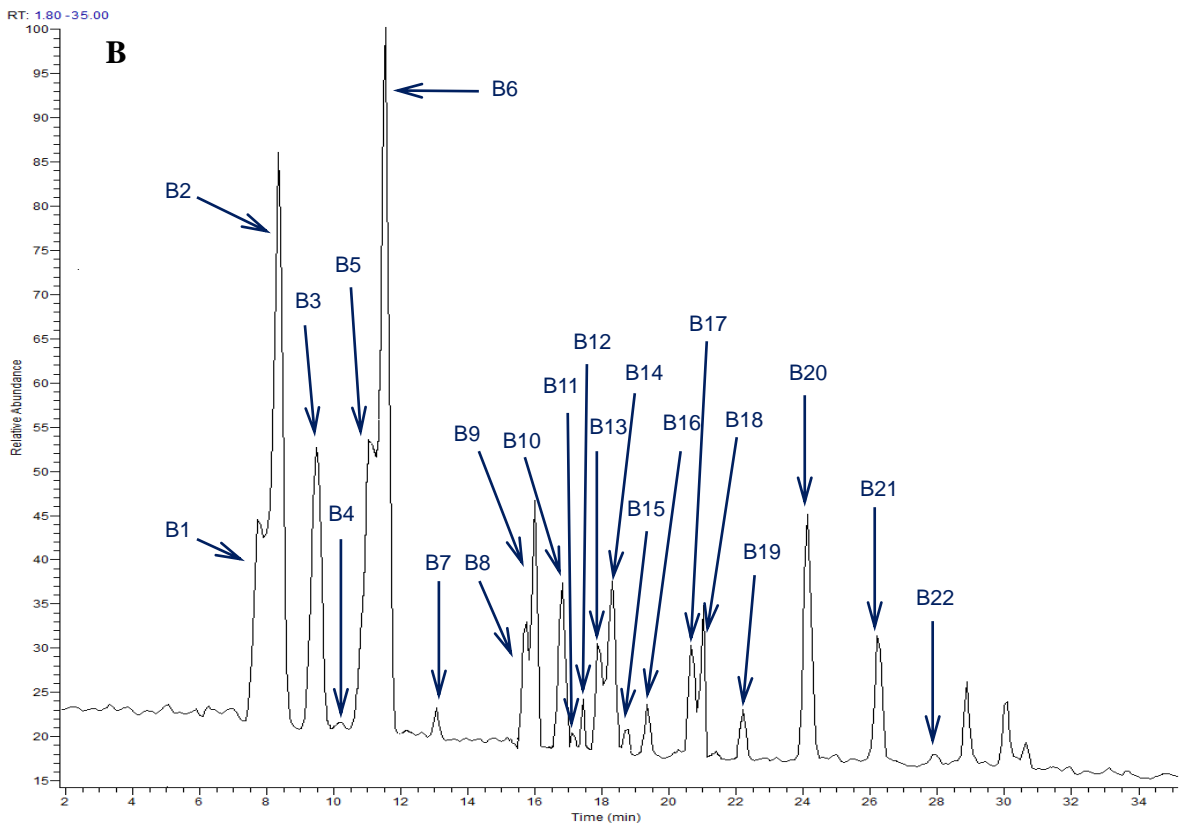

**Figure S4.** Base peak chromatograms of Fr. 1 (A) and Fr. 2 (B) in HPLC-LTQ-Orbitrap-MS<sup>n</sup> analysis.

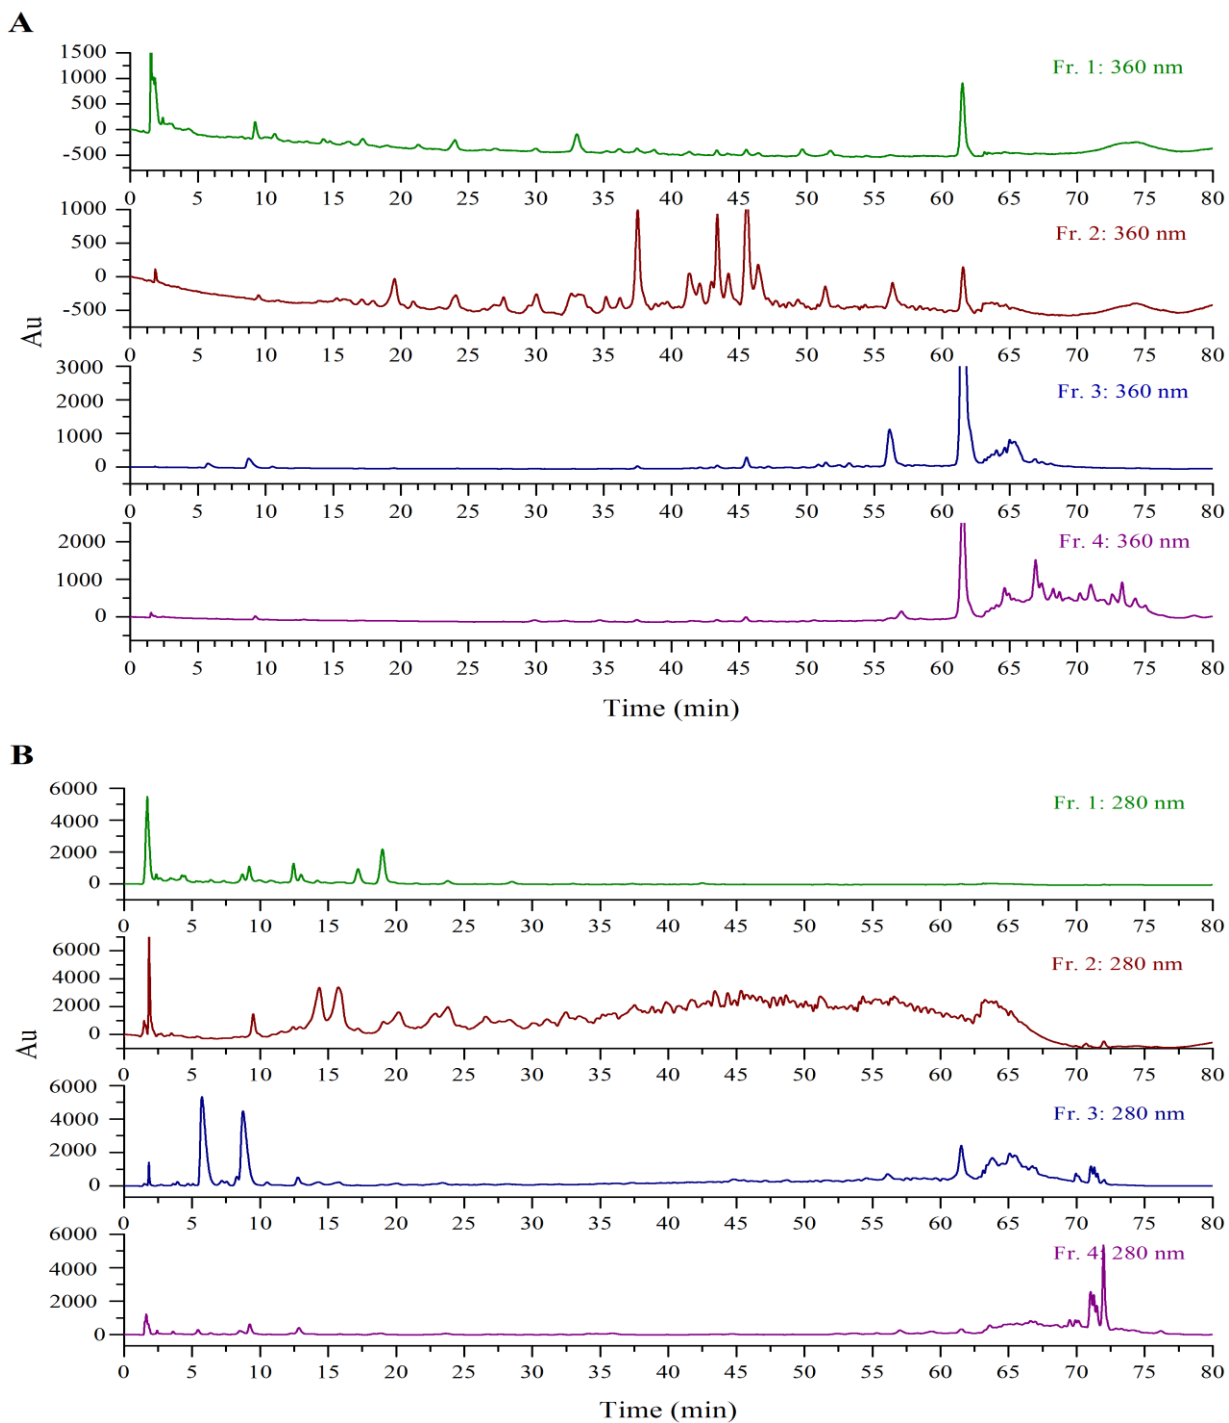

**Figure S5.** HPLC fingerprint chromatograms at 360 nm (**A**) and 280 nm (**B**) of the four fractions (Frs. 1–4) eluted from D101 resin column. The gradient solvent system consisting of A (methanol) and B (water containing 0.1% acetic acid, *v/v*) was as follows: 0–10 min, 5–10% A; 10–30 min, 10–15% A; 30–40 min, 15–20% A; 40–50 min, 20–25% A; 50–60 min, 25–35% A; 60–70 min, 35–90% A; 70–80 min, 90–60% A.



## References

1. Bunzel, M.; Allerdings E.; Sinwell, V.; Ralph J.; Steinhart H. Cell wall hydroxycinnamates in wild rice (*Zizania aquatica* L.) insoluble dietary fibre. *Eur. Food. Res. Technol.* **2002**, *214*, 482–488.
2. Qiu, Y.; Liu Q.; Beta, T. Antioxidant properties of commercial wild rice and analysis of soluble and insoluble phenolic acids. *Food Chem.* **2010**, *121*, 140–147.
3. Sumczynski D.; Kotásková E.; Orsavová J.; Valášek P. Contribution of individual phenolics to antioxidant activity and *in vitro* digestibility of wild rices (*Zizania aquatica* L.). *Food Chem.* **2017**, *218*, 107–115.
4. Bunzel, M.; Ralph, J.; Kim, H.; Lu, F.; Ralph, S. A.; Marita, J. M.; Hatfield, R. D.; Steinhart, H. Sinapate dehydrodimers and sinapate–ferulate heterodimers in cereal dietary fiber. *J. Agric. Food Chem.* **2003**, *51*, 1427–1434.
5. Qiu, Y.; Liu Q.; Beta, T. Antioxidant activity of commercial wild rice and identification of flavonoid compounds in active fractions. *J. Agric. Food Chem.* **2009**, *57*, 7543–7551.
